# Supplementary material
Source: MDPI journal article supplement (https://www.mdpi.com/2673-9496/2/1/1)
Supplement: s1 [file s1]

# Recovery of Haemal Lordosis in European Seabass *Dicentrarchus labrax* (Linnaeus 1758)<sup>†</sup>

Stephanos Fragkoulis <sup>1,†</sup>, Chara Kourkouta <sup>1,†</sup>, George Geladakis <sup>1,†</sup>, Alice Printzi <sup>1,†,§</sup>, Alexis Glaropoulos <sup>2</sup> and George Koumoundouros <sup>1,\*</sup>

<sup>1</sup> Biology Department, University of Crete, 70013 Heraklion, Greece;  
stefanos\_fragkoulis@hotmail.com (S.F.); xarakourkouta@hotmail.com (C.K.);  
georgiosgeladakis90@gmail.com (G.G.); alikipr95@gmail.com (A.P.)

<sup>2</sup> AVRAMAR S.A., PEO Patron—Athinon 55, Agios Vasilios, 26500 Rion, Greece;  
a.glaropoulos@avramar.eu

\* Correspondence: gkoumound@uoc.gr

† This paper is dedicated to the memory of Dr. Pascal Divanach, an outstanding researcher and mentor who has made pioneering contributions to the science of Aquaculture. He was the first who conceived and tested the hypothesis of exercised-induced (haemal) lordosis in fish.

‡ These authors contributed equally to this work.

§ Current address: IFREMER (Institut Français de Recherche pour l'Exploitation de la Mer), Marine & Coastal Sciences Doctoral School, University of Brest, CNRS, IRD, LEMAR, 29280 Brest, Plouzané, France.

**Table S1.** Lordosis rates, sample and expected for the population, at 111 and 150 dph. N, fish with normal external morphology. L, fish with lordotic external morphology.

| Age (dph) | External morphology | Lordosis % in the sample | Fish number in the population | No of lordotic fish in the population (expected) | Lordosis rate – (population, expected) |
|-----------|---------------------|--------------------------|-------------------------------|--------------------------------------------------|----------------------------------------|
| 111       | N                   | 16.5 (33/200)            | 400                           | 66                                               | 44.3                                   |
|           | L                   | 100 (100/100)            | 200                           | 200                                              |                                        |
| 150       | N+L                 | 46.2 (43/93)             |                               |                                                  | 46.2                                   |

**Table S2.** Cumulative frequency of fish with lordotic (L), recovered (N-Rec) and normal (N) external morphology based on the degrees of the PrAn<sub>I</sub> index. At the juvenile stage, the N-Rec group consists of the lordotic juveniles that presented recovered external morphology at the adult stage.

| Juveniles (150 dph) |   |       |   | Adults (502 dph) |     |       |     |
|---------------------|---|-------|---|------------------|-----|-------|-----|
| Angle (°)           | L | N-Rec | N | Angle (°)        | L   | N-Rec | N   |
|                     |   |       |   | 129              | 3   |       |     |
|                     |   |       |   | 130              | 3   |       |     |
|                     |   |       |   | 131              | 3   |       |     |
|                     |   |       |   | 132              | 3   |       |     |
|                     |   |       |   | 133              | 3   |       |     |
|                     |   |       |   | 134              | 6   |       |     |
|                     |   |       |   | 135              | 10  |       |     |
|                     |   |       |   | 136              | 10  |       |     |
|                     |   |       |   | 137              | 13  |       |     |
|                     |   |       |   | 138              | 13  |       |     |
|                     |   |       |   | 139              | 19  |       |     |
|                     |   |       |   | 140              | 26  |       |     |
|                     |   |       |   | 141              | 29  |       | 0   |
|                     |   |       |   | 142              | 32  | 0     | 1   |
|                     |   |       |   | 143              | 48  | 2     | 2   |
|                     |   |       |   | 144              | 65  | 9     | 7   |
|                     |   |       |   | 145              | 81  | 13    | 14  |
|                     |   |       |   | 146              | 81  | 26    | 19  |
|                     |   |       |   | 147              | 90  | 37    | 31  |
|                     |   |       |   | 148              | 94  | 54    | 48  |
|                     |   |       |   | 149              | 100 | 72    | 61  |
|                     |   |       |   | 150              |     | 85    | 79  |
|                     |   |       |   | 151              |     | 91    | 89  |
|                     |   |       |   | 152              |     | 100   | 94  |
|                     |   |       |   | 153              |     |       | 96  |
|                     |   |       |   | 154              |     |       | 98  |
|                     |   |       |   | 155              |     |       | 100 |

**Table S3.** Cumulative frequency of fish with lordotic (L), recovered (N-Rec) and normal (N) external morphology based on the degrees of the PrAn<sub>2</sub> index. At the juvenile stage, the N-Rec group consists of the lordotic juveniles that presented recovered external morphology at the adult stage.

| Juveniles (150 dph) |    |       |    | Adults (502 dph) |    |       |    |
|---------------------|----|-------|----|------------------|----|-------|----|
| Angle (°)           | L  | N-Rec | N  | Angle (°)        | L  | N-Rec | N  |
| 251                 | 3  |       |    | 253              | 3  |       |    |
| 250                 | 3  |       |    | 252              | 3  |       |    |
| 249                 | 3  |       |    | 251              | 3  |       |    |
| 248                 | 3  |       |    | 250              | 3  |       |    |
| 247                 | 3  |       |    | 249              | 3  |       |    |
| 246                 | 3  |       |    | 248              | 3  |       |    |
| 245                 | 3  |       |    | 247              | 3  |       |    |
| 244                 | 3  |       |    | 246              | 3  |       |    |
| 243                 | 3  |       |    | 245              | 3  |       |    |
| 242                 | 3  |       |    | 244              | 3  |       |    |
| 241                 | 10 |       |    | 243              | 3  |       |    |
| 240                 | 10 |       |    | 242              | 3  |       |    |
| 239                 | 10 |       |    | 241              | 3  |       |    |
| 238                 | 13 |       |    | 240              | 3  |       |    |
| 237                 | 13 |       |    | 239              | 6  |       |    |
| 236                 | 13 |       |    | 238              | 6  |       |    |
| 235                 | 19 |       |    | 237              | 6  |       |    |
| 234                 | 26 |       |    | 236              | 6  |       |    |
| 233                 | 26 |       |    | 235              | 10 |       |    |
| 232                 | 29 | 0     |    | 234              | 10 |       |    |
| 231                 | 29 | 2     |    | 233              | 13 |       |    |
| 230                 | 29 | 2     |    | 232              | 13 |       |    |
| 229                 | 29 | 4     |    | 231              | 13 |       |    |
| 228                 | 29 | 7     |    | 230              | 13 |       |    |
| 227                 | 29 | 7     |    | 229              | 13 |       |    |
| 226                 | 35 | 9     |    | 228              | 19 |       |    |
| 225                 | 35 | 9     |    | 227              | 23 |       |    |
| 224                 | 39 | 13    |    | 226              | 26 |       |    |
| 223                 | 42 | 13    |    | 225              | 26 |       |    |
| 222                 | 48 | 20    |    | 224              | 26 |       | 0  |
| 221                 | 52 | 22    |    | 223              | 26 |       | 1  |
| 220                 | 65 | 30    | 0  | 222              | 26 |       | 1  |
| 219                 | 68 | 35    | 1  | 221              | 32 |       | 2  |
| 218                 | 68 | 39    | 2  | 220              | 39 | 0     | 2  |
| 217                 | 77 | 50    | 3  | 219              | 48 | 2     | 4  |
| 216                 | 81 | 57    | 7  | 218              | 55 | 4     | 5  |
| 215                 | 81 | 65    | 11 | 217              | 55 | 4     | 7  |
| 214                 | 81 | 72    | 13 | 216              | 65 | 7     | 11 |
| 213                 | 84 | 76    | 17 | 215              | 74 | 9     | 11 |
| 212                 | 90 | 83    | 20 | 214              | 77 | 13    | 14 |
| 211                 | 94 | 89    | 26 | 213              | 81 | 17    | 17 |
|                     |    |       |    | 212              | 84 | 24    | 19 |
|                     |    |       |    | 211              | 84 | 26    | 22 |

|     |     |     |     |     |     |     |     |
|-----|-----|-----|-----|-----|-----|-----|-----|
| 210 | 94  | 89  | 33  | 210 | 84  | 30  | 25  |
| 209 | 94  | 91  | 43  | 209 | 90  | 37  | 31  |
| 208 | 94  | 96  | 49  | 208 | 90  | 39  | 37  |
| 207 | 94  | 100 | 61  | 207 | 94  | 46  | 42  |
| 206 | 94  |     | 65  | 206 | 94  | 59  | 47  |
| 205 | 97  |     | 73  | 205 | 97  | 61  | 53  |
| 204 | 97  |     | 79  | 204 | 97  | 67  | 60  |
| 203 | 97  |     | 83  | 203 | 100 | 72  | 66  |
| 202 | 97  |     | 87  | 202 |     | 76  | 73  |
| 201 | 97  |     | 92  | 201 |     | 85  | 77  |
| 200 | 100 |     | 94  | 200 |     | 87  | 80  |
| 199 |     |     | 96  | 199 |     | 91  | 86  |
| 198 |     |     | 96  | 198 |     | 93  | 88  |
| 197 |     |     | 97  | 197 |     | 96  | 92  |
| 196 |     |     | 98  | 196 |     | 96  | 94  |
| 195 |     |     | 98  | 195 |     | 100 | 94  |
| 194 |     |     | 99  | 194 |     |     | 95  |
| 193 |     |     | 99  | 193 |     |     | 96  |
| 192 |     |     | 100 | 192 |     |     | 98  |
|     |     |     |     | 191 |     |     | 98  |
|     |     |     |     | 190 |     |     | 99  |
|     |     |     |     | 189 |     |     | 99  |
|     |     |     |     | 188 |     |     | 100 |

---
